# Supplementary material
Source: Springer Nature journal article supplement (https://www.springermedizin.de/resource/supplementary/13012_2011_445_MOESM2_ESM.pdf/9630060)
Supplement: MOESM2 [file 9630060]

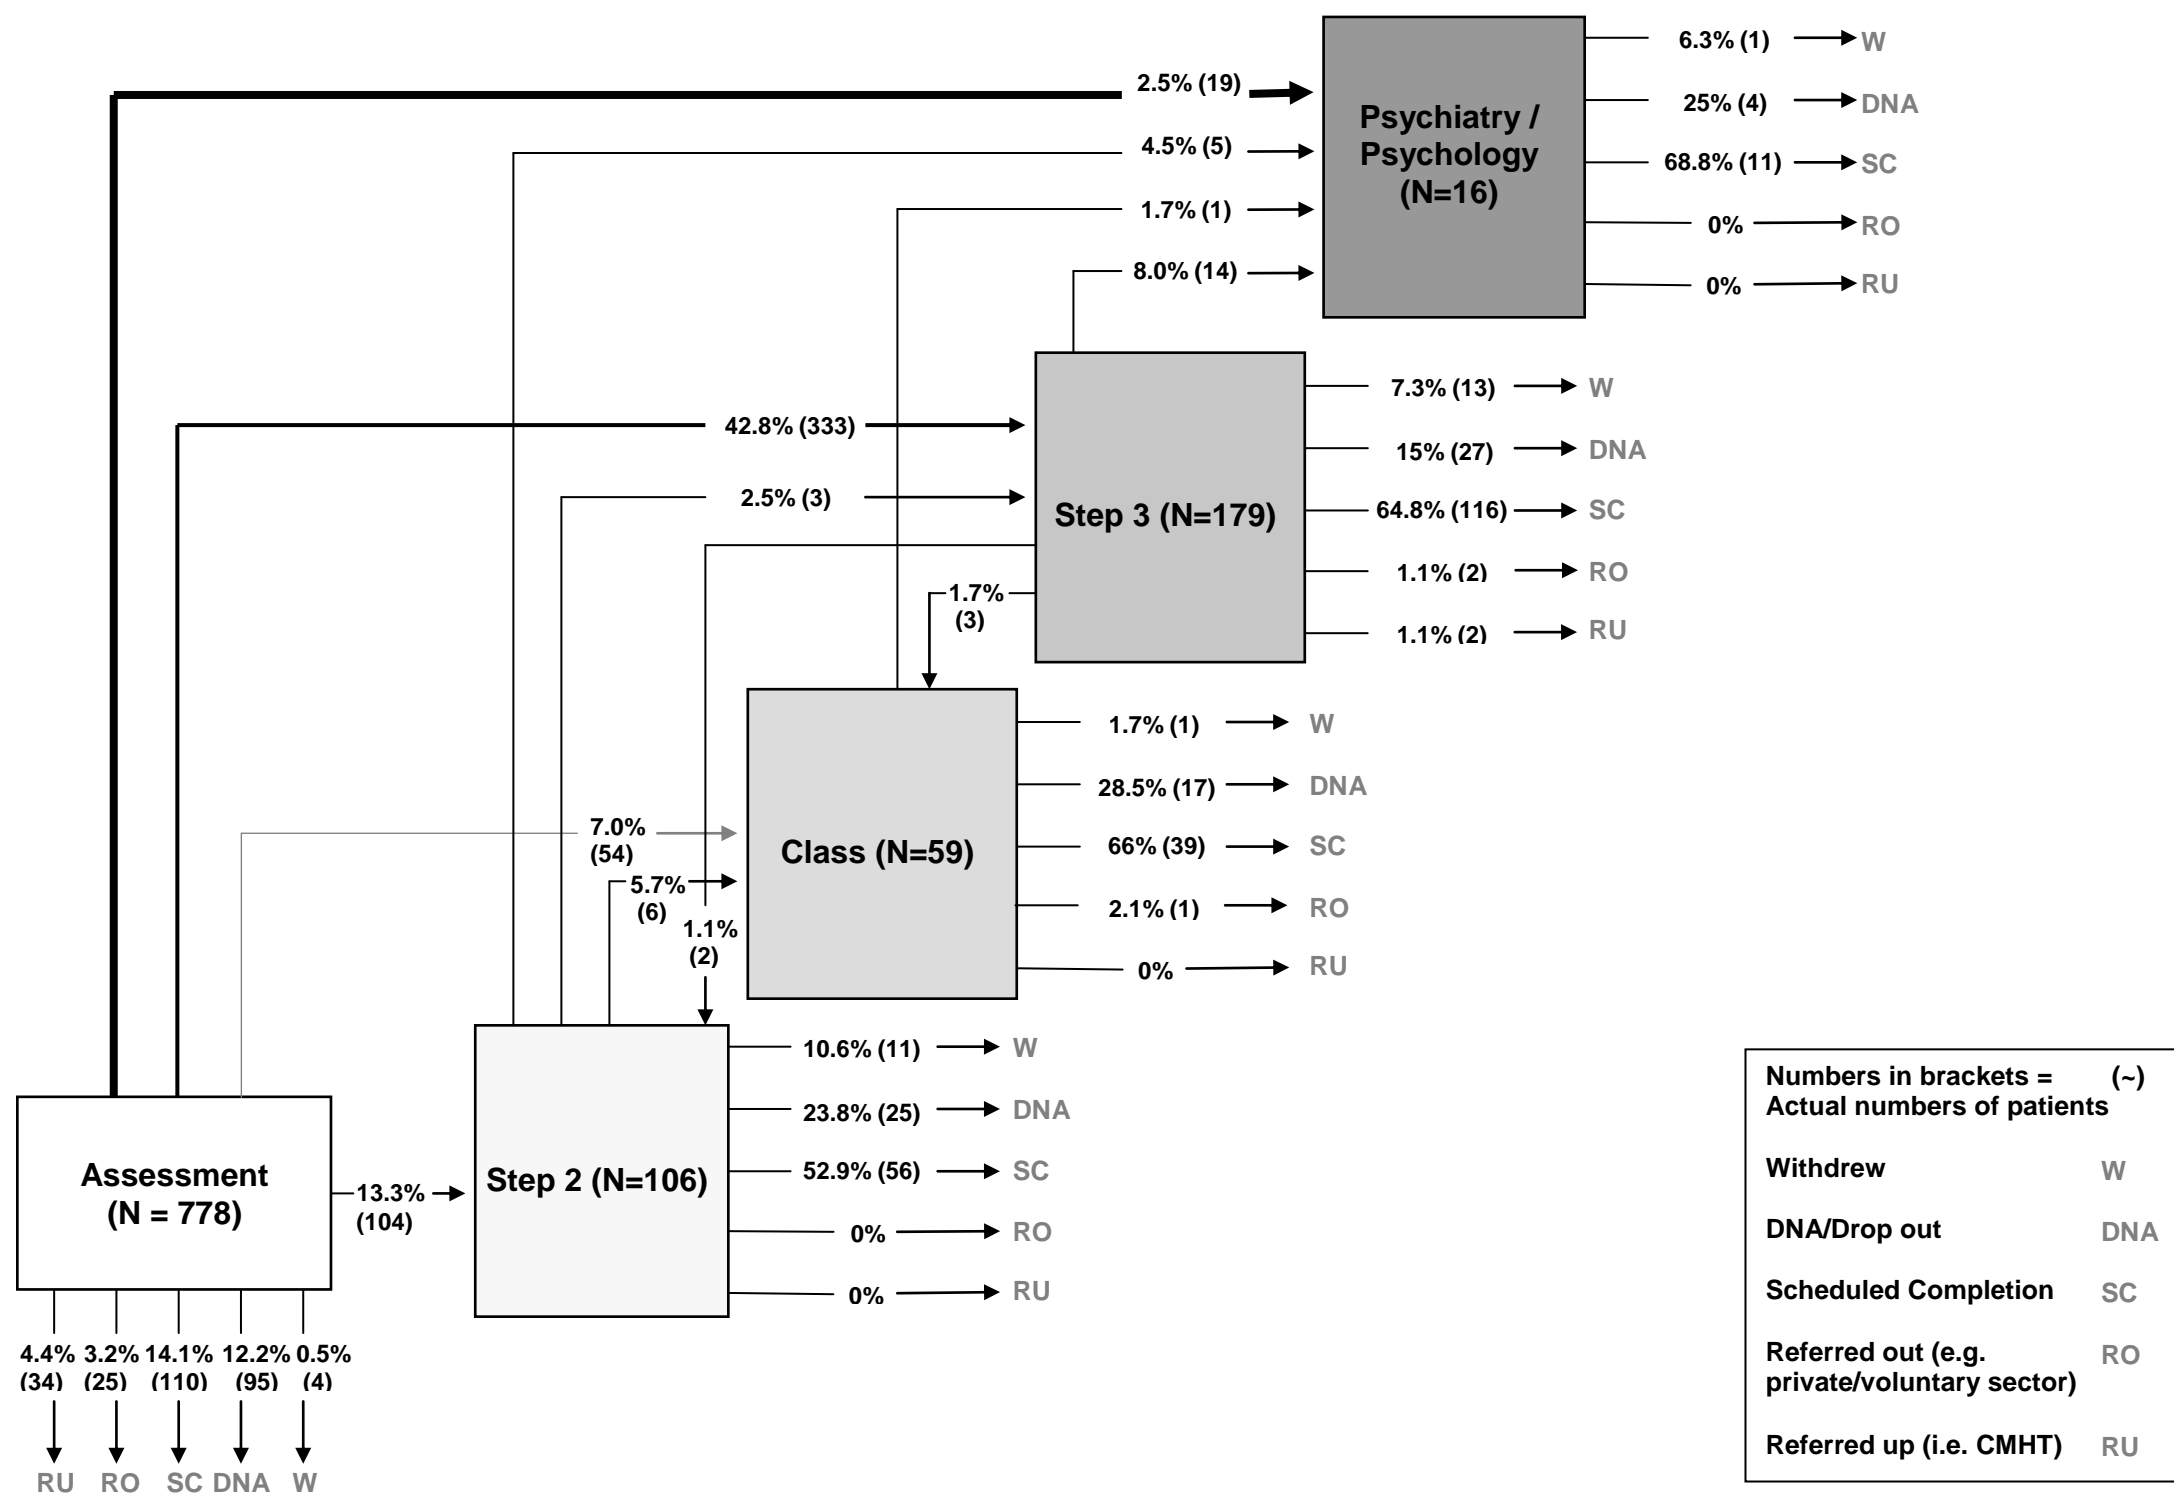

**Numbers in brackets = (~)**  
**Actual numbers of patients**

**Withdrew** W  
**DNA/Drop out** DNA  
**Scheduled Completion** SC  
**Referred out (e.g. private/voluntary sector)** RO  
**Referred up (i.e. CMHT)** RU
